# Supplementary material for: Disparity-aware energy system modelling resolves potential transition injustices
Source: Research Square preprint supplement (doi:10.21203/rs.3.rs-6578401/v1), 2025-05-14
Supplement: Supplementary file 1 [file 22e0cfa82b3fefbd644f61f6.pdf]

1 **Supplementary material for “Disparity-aware**  
2 **energy system modelling resolves potential**  
3 **transition injustices”**

4 **Meijun Chen<sup>1,\*</sup>, Francesco Sanvito<sup>1</sup>, Jan Kwakkel<sup>1</sup>, and Stefan Pfenninger-Lee<sup>1</sup>**

5 <sup>1</sup> **Delft University of Technology, Technology, Policy and Management, Delft, 2628BX, The Netherlands**

6 <sup>\*</sup> **m.chen-4@tudelft.nl**

7

8 **S1. Comparison between relative investment intensity across system designs in**  
9 **Pickering et al. (2022) and the *Reference* setup in this study**

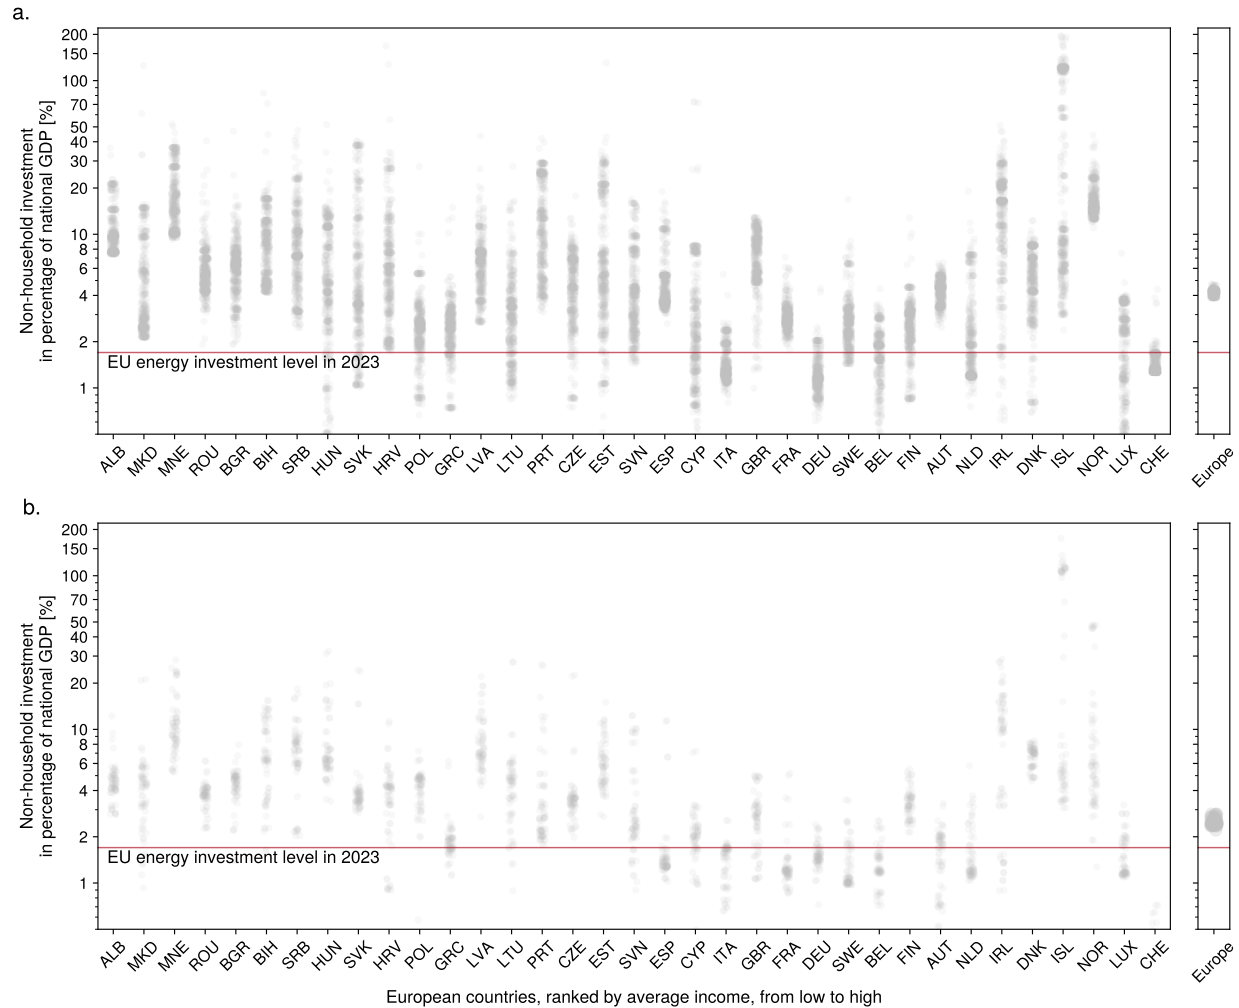

**Figure S1.** Comparison between the results of Pickering et al. (2022) and the *Reference* setup of this study. Although the current study's *Reference* setup includes fewer system designs than Pickering et al. (2022), and the relative investment intensity at the European level differs significantly, the overall trend remains similar in both cases. The value ranges for most countries are comparable.

# **S2. Investment breakdown in technology types of all countries in the *Reference* and *Combined* setup**

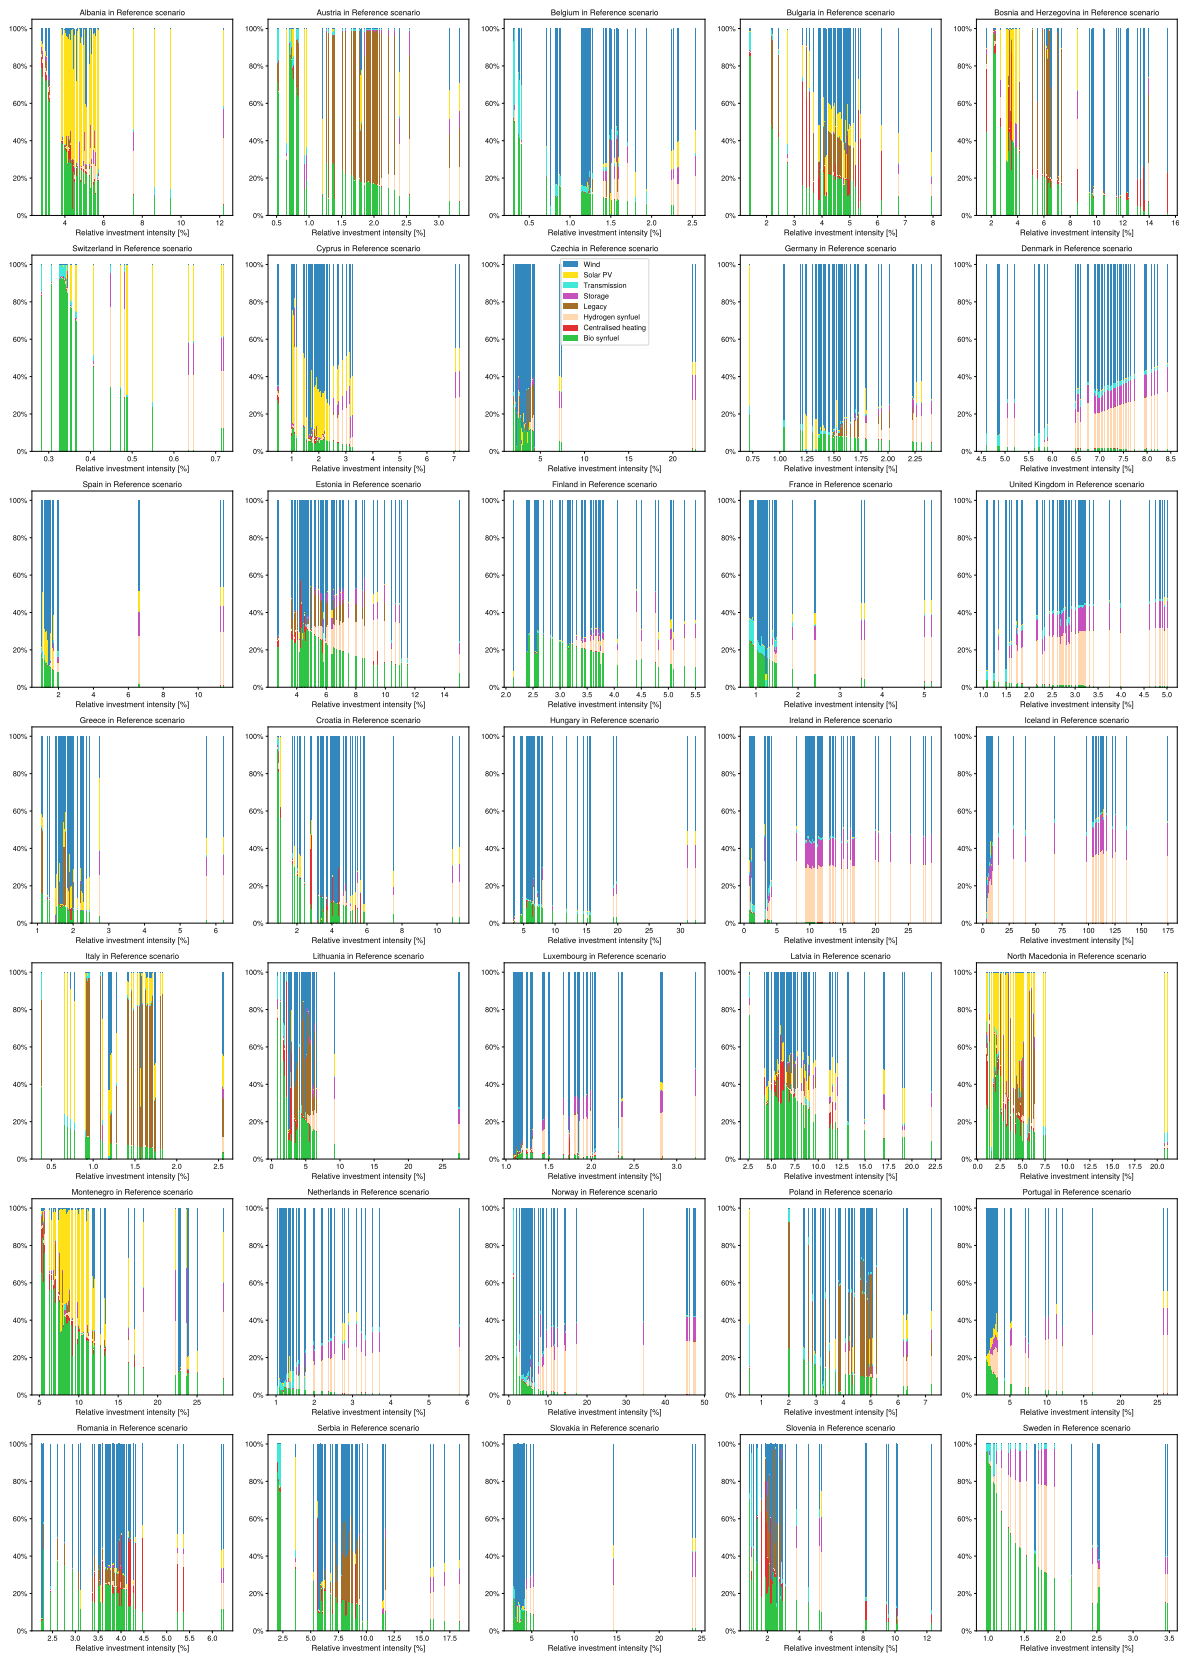

**Figure S2.** Investment share of each type of technology in each country in each system design in the *Reference* setup. For the sake of space, the legend is put into the plot space of Czechia. The y-axis is the percentage of investment into each technology type in each country.

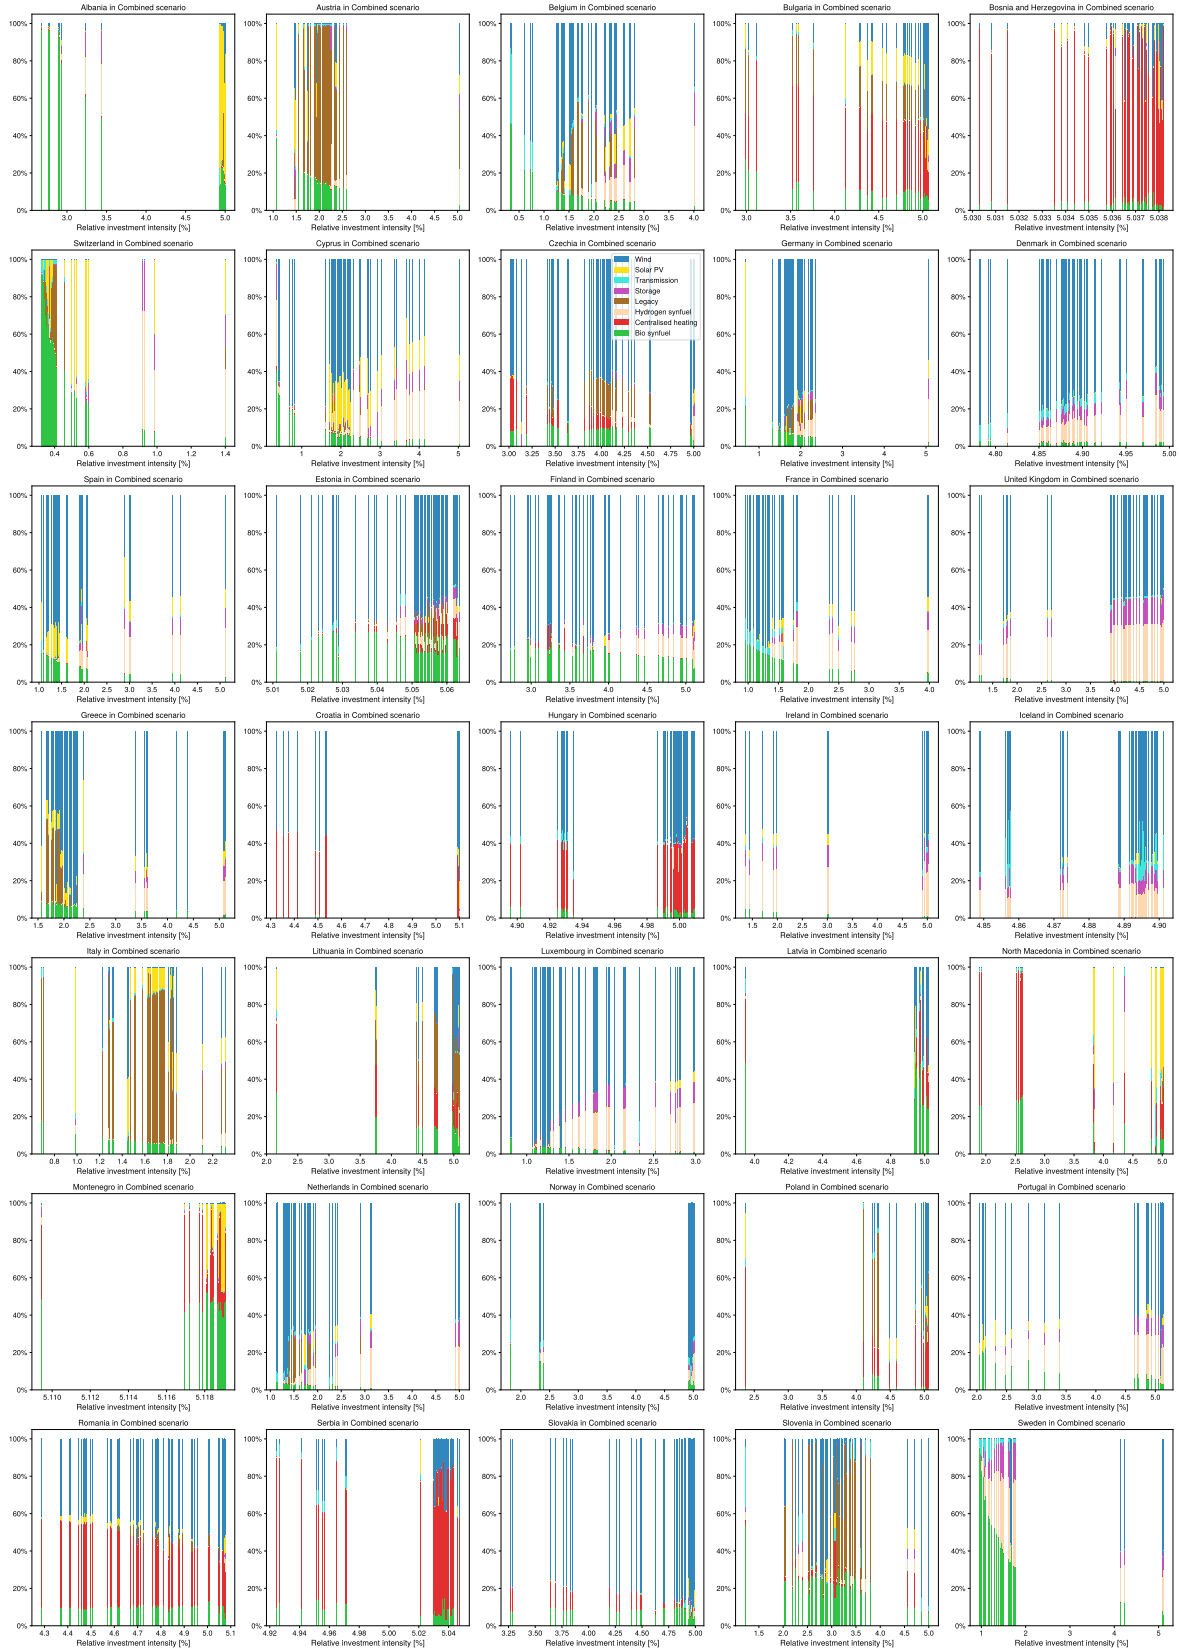

**Figure S3.** Investment share of each type of technology in each country in each system design in the *Combined* setup.

### **S3. Data retrieved from other open sources**

Data used in this study, retrieved from other sources, such as national GDP and existing technology capacity, are documented in the file `Data_sources_disparity_aware.xlsx` in the attachment.

### **References**

Pickering, B., Lombardi, F., and Pfenninger, S. (2022). Diversity of options to eliminate fossil fuels and reach carbon neutrality across the entire European energy system. *Joule*, 6(6):1253–1276.
