# Supplementary material for: Disparity-aware energy system modelling resolves potential transition injustices
Source: Research Square preprint supplement (doi:10.21203/rs.3.rs-6578401/v1), 2025-05-14
Supplement: Supplementary file 1 [file f5ef93cf1735906d8b2ed8be.xlsx]

## Sheet: Sheet1
Category 1. Existing capacity of different countries
Technology	Data source	Year	Missing countries	Sources for missing data	Additional notes
battery	Energy storage database	2020	ALB, BGR, BIH, EST, HRV, ISL, LUX, LVA, MKD, MNE, SRB	/	Didn't search specifically for missing countries; all missing countries capacity are assumed to be zero
ccgt	powerplantmatching	2023 (accessed)	ALB, BIH, CYP, ISL, LUX, MNE, MKD	Source for ALB: https://www.tecnimont.it/en/what-we-do/power/vlore-ccgt Source for BIH: https://www.power-technology.com/marketdata/power-plant-profile-zenica-cogeneration-plant-bosnia-and-herzegovina/ Source for CYP: https://www.gem.wiki/Mari_power_station and https://www.dieselgasturbine.com/news/First-private-gas-fired-combined-cycle-power-plant-on-Cyprus/8010802.article	Other countries where data is missing are assumed to have zero existing ccgt capacity in the calculation
chp_biofuel_extraction	JRC IDEES	2015	ALB, BIH, CHE, ISL, MNE, MKD, NOR, SRB	/
	Fuel used in combined heat and power (solid biofuels and biogases)	2021	ALB, BIH, CHE, GBR, ISL, MKD, MNE, NOR, SRB	/
chp_wte_back_pressure	JRC IDEES	2015
	Fuel used in combined heat and power (all the waste categories)	2021	ALB, BIH, CHE, GBR, ISL, MKD, MNE, NOR, SRB	To split waste and bio capacity, GBR data is here: https://www.gov.uk/government/statistics/combined-heat-and-power-chapter-7-digest-of-united-kingdom-energy-statistics-dukes # Excel sheet DUKES_7.1, Sheet 7.1.B, Overall fuel used in CHP, 3 categories of total renewables versus waste summed up.
chp_methane_extraction	JRC IDEES	2015
nuclear	IAEA Country statistics	2023 (accessed)
open_field_pv	IRENA	2022 (accessed in 2023)
roof_mounted_pv	Electricity production capacities for renewables and wastes (Solar PV < 20 kW for households)	2021	CHE
wind_offshore	IRENA	2022 (accessed in 2023)
wind_onshore	IRENA	2022 (accessed in 2023)
Category 2. Demographic data of each country
Indicator	Data source	Year	Missing countries	Sources for missing data	Additional notes
Personal income	Mean and median income by age and sex	2022	BIH, SRB	Serbia value source: https://data.stat.gov.rs/Home/Result/2403040409?languageCode=en-US&displayMode=table The value of 2022 net income of 899196 RSD is used. And to transform it into euro, a rate of 1 RSD = 0.0085 EUR is applied. Source: https://www.exchange-rates.org/converter/rsd-eur, 3-year trend BIH value: 1122 BAM/month * 12 month * 0.51 EUR/BAM = 6867 EUR. Source: https://bhas.gov.ba/data/P…	Regarding the explanation of this dataset: https://ec.europa.eu/eurostat/cache/metadata/en/ilc_sieusilc.htm And also its connection to the population: https://ec.europa.eu/eurostat/cache/metadata/Annexes/ilc_sieusilc_an_9.pdf
Population	Population on 1 Jan	2023
GDP of the whole country	GDP and main components (output, expenditure and income)	2022
Expenditure on household appliances as percentage of income	Structure of consumption expenditure by COICOP consumption purpose	2020	ALB, BIH, CHE, ISL	CHE value source: https://www.bfs.admin.ch/bfs/en/home/statistics/economic-social-situation-population/income-consumption-wealth/household-budget/household-expenditure.assetdetail.23747620.html, category 583	ALB, BIH and ISL are approximated by MKD, HRV and NOR
